# Supplementary material for: Effect of Cu intercalation on humidity sensing properties of Bi2Se3 topological insulator single crystals
Source: Royal Society of Chemistry journal article supplement (doi:10.1039/c8cp05452e), 2018-01-01
Supplement: c8cp05452e1.pdf [file c8cp05452e1.pdf]

## Effect of Cu intercalation on humidity sensing properties of Bi<sub>2</sub>Se<sub>3</sub> topological insulator single crystals

Kushal Mazumder<sup>1</sup>, Alfa Sharma<sup>2</sup>, Yogendra Kumar<sup>2</sup> and Parasharam M. Shirage<sup>1,2,\*</sup>

<sup>1</sup>Discipline of Physics, Indian Institute of Technology Indore, Simrol, Indore-453552, India

<sup>2</sup>Discipline of Metallurgy Engineering & Materials Science, Indian Institute of Technology Indore, Simrol, Indore-453552, India

### Supplementary Information

**Table 1:** Structural parameters obtained from a Rietveld refinement of room temperature powder x-ray patterns shown in Fig. 3.

| Sample                                             | Atom | X | Y | Z       | Occupancy |
|----------------------------------------------------|------|---|---|---------|-----------|
| Bi <sub>2</sub> Se <sub>3</sub>                    | Bi   | 0 | 0 | 0.40276 | 0.09211   |
| $a=b=4.141\pm 0.003\text{\AA}$                     | Se1  | 0 | 0 | 0       | 0.08892   |
| $c=28.665\pm 0.002\text{\AA}$                      | Se2  | 0 | 0 | 0.20841 | 0.18040   |
| Cu <sub>0.13</sub> Bi <sub>2</sub> Se <sub>3</sub> | Bi   | 0 | 0 | 0.40142 | 0.08779   |
| $a=b=4.141\pm 0.002\text{\AA}$                     | Se1  | 0 | 0 | 0       | 0.03658   |
| $c=28.713\pm 0.003\text{\AA}$                      | Se2  | 0 | 0 | 0.20091 | 0.08305   |
| Cu <sub>0.25</sub> Bi <sub>2</sub> Se <sub>3</sub> | Bi   | 0 | 0 | 0.40089 | 0.08478   |
| $a=b=4.141\pm 0.004\text{\AA}$                     | Se1  | 0 | 0 | 0       | 0.01031   |
| $c=28.734\pm 0.003\text{\AA}$                      | Se2  | 0 | 0 | 0.20024 | 0.02358   |

**Table 2:** Hysteresis values of pure and Cu intercalated  $\text{Bi}_2\text{Se}_3$  ( $\text{Cu}_0\text{Bi}_2\text{Se}_3$ ,  $\text{Cu}_{0.13}\text{Bi}_2\text{Se}_3$  and  $\text{Cu}_{0.25}\text{Bi}_2\text{Se}_3$ ) at different levels of %RH.

| RH% | $\text{Bi}_2\text{Se}_3$ | $\text{Cu}_{0.13}\text{Bi}_2\text{Se}_3$ | $\text{Cu}_{0.25}\text{Bi}_2\text{Se}_3$ |
|-----|--------------------------|------------------------------------------|------------------------------------------|
| 8   | 0.00177                  | 0.00021                                  | 0.00050                                  |
| 33  | 0.00188                  | 0.00966                                  | 0.00117                                  |
| 43  | 0.00212                  | 0.00318                                  | 0.00133                                  |
| 52  | 0.00070                  | 0.00546                                  | 0.00104                                  |
| 63  | 0.00377                  | 0.00028                                  | 0.00084                                  |
| 75  | 0.00396                  | 0.00693                                  | 0.00079                                  |
| 86  | 0.00115                  | 0.00481                                  | 0.00048                                  |
| 97  | 0.00041                  | 0.00021                                  | 0.00023                                  |

**Table 3:** Freundlich adsorption isotherm model results, including adsorption capacity ( $k$ ), adsorption strength ( $\alpha$ ), and  $R^2$  values vs. the experimental data for humidity sensing using  $\text{Bi}_2\text{Se}_3$ ,  $\text{Cu}_{0.13}\text{Bi}_2\text{Se}_3$  and  $\text{Cu}_{0.25}\text{Bi}_2\text{Se}_3$ .

| Sample                                   | Low RH Regime |           |       | High RH Regime |           |       |
|------------------------------------------|---------------|-----------|-------|----------------|-----------|-------|
|                                          | $k$           | $\alpha$  | $R^2$ | $k$            | $\alpha$  | $R^2$ |
| $\text{Bi}_2\text{Se}_3$                 | 1.03±0.06     | 1.72±0.14 | 0.96  | 1.32±0.27      | 0.40±0.04 | 0.97  |
| $\text{Cu}_{0.13}\text{Bi}_2\text{Se}_3$ | 2.31±0.29     | 1.22±0.16 | 0.87  | 1.46±0.31      | 0.66±0.09 | 0.92  |
| $\text{Cu}_{0.25}\text{Bi}_2\text{Se}_3$ | 4.3±0.19      | 0.91±0.08 | 0.92  | 3.03±0.16      | 0.87±0.02 | 0.95  |

**Table 4:** Comparative analysis of Cu intercalated Bi<sub>2</sub>Se<sub>3</sub> TI humidity sensor in terms of linear range, sensitivity, response and recovery time with available literatures.

| <b>Material</b>                                             | <b>Linear Range (%)</b> | <b>Sensitivity</b>             | <b>Response/ Recovery Time (s)</b>    | <b>Reference</b> |
|-------------------------------------------------------------|-------------------------|--------------------------------|---------------------------------------|------------------|
| ZnO nanowires                                               | 25 to 90                | 184                            | NA                                    | 1                |
| MoS <sub>2</sub> film                                       | 13.3 to 83.5            | 16.08(p-type)<br>89.66(n-type) | 55s/288s(p-type)<br>174s/345s(n-type) | 2                |
| SnO <sub>2</sub> :Sn composite thin film                    | 11 to 95                | 265                            | 80s/140s                              | 3                |
| CuO nanowires                                               | 20 to 90                | 12.72%                         | NA                                    | 4                |
| Porous titania ceramics                                     | 11 to 95                | ~10 <sup>4</sup>               | 32s/131s                              | 5                |
| ZnO nanosheets                                              | 12 to 96                | 220                            | 600s/3s                               | 6                |
| Sn-doped ZnO nanorod Arrays                                 | 40 to 90                | 3.41                           | 230s/30s                              | 7                |
| ZnO nanorods                                                | 33 to 95                | 61.23                          | NA                                    | 8                |
| SnO <sub>2</sub> Nanowire                                   | 5 to 85                 | 32                             | 120s/20s                              | 9                |
| WS <sub>2</sub> /WSe <sub>2</sub> Nanohybrids               | 40 to 80                | 57                             | 40s/65s                               | 10               |
| Fe <sub>2</sub> O <sub>3</sub> /SiO <sub>2</sub> composites | 11 to 95                | 10 <sup>4</sup>                | 20s/40s                               | 11               |
| WS <sub>2</sub> nanosheets                                  | 40 to 80                | 37.5                           | 13s/17s                               | 12               |
| NiO–SnO <sub>2</sub> nanofibers                             | 0 to 100                | 83                             | 22s/44s                               | 13               |
| Polyaniline/WS <sub>2</sub> composite                       | 10 to 97                | 88.46                          | 56s/70s                               | 14               |
| rGO/MoS <sub>2</sub> hybrid composites                      | 10 to 90                | 49                             | 17s/474s                              | 15               |
| Single crystalline ZnO nanowire                             | 10 to 90                | 88                             | 60s/3s                                | 16               |
| Co doped mesoporous TiO <sub>2</sub>                        | 9 to 90                 | 10 <sup>5</sup>                | 24s/400s                              | 17               |

|                                                    |          |                  |             |                  |
|----------------------------------------------------|----------|------------------|-------------|------------------|
| WS <sub>2</sub> /GO Nanohybrids                    | 40 to 80 | 0.044/%RH        | 25s/29s     | 18               |
| TiO <sub>2</sub> nanotubes                         | 11 to 95 | ~57              | 100s/190s   | 19               |
| TiO <sub>2</sub> nanowires /Nafion                 | 12 to 97 | >1000            | <120s/<120s | 20               |
| TiO <sub>2</sub> thin film                         | 11 to 97 | ~10 <sup>2</sup> | 10s/176s    | 21               |
| ZnO nanocrystals                                   | 5 to 85  | 150              | 50s/6s      | 22               |
| graphene/TiO <sub>2</sub> composites               | 12 to 90 | 10 <sup>2</sup>  | 128s/68s    | 23               |
| WO <sub>3</sub> -SnO <sub>2</sub> nanospheres      | 35 to 98 | 16.2             | 8s/29s      | 24               |
| MoS <sub>2</sub> Thin Film                         | 25 to 40 | 5.5              | 250s/250s   | 25               |
| MoS <sub>2</sub> Nanosheets                        | 10 to 60 | ~3               | 9s/17s      | 26               |
| WS <sub>2</sub> spherical nanoparticle             | 11 to 97 | 469              | 12s/13s     | 27               |
| VS <sub>2</sub> nanosheets                         | 0 to 100 | ~325             | 40s/50s     | 28               |
| SnSe nanorods                                      | 11-97    | ~100             | 68/149s     | 29               |
| Zn <sub>1-x</sub> Ni <sub>x</sub> O nanostructures | 33-97    | 152              | 27/3 s      | 30               |
| CoFe <sub>2</sub> O <sub>4</sub> nanoparticles     | 8-97     | ~590             | 25/2.6 s    | 31               |
| Cu <sub>x</sub> Bi <sub>2</sub> Se <sub>3</sub>    | 8-97     | 849              | 24 s/25 s   | <i>This work</i> |

#### Reference:

1. S. P. Chang, S. J. Chang, C. Y. Lu, M. J. Li, C. L. Hsu, Y. Z. Chiou, T. J. Hsueh and I. C. Chen, *Superlattices and Microstructures*. 2010, **47**, 772-778.
2. J. Shin, Y. Hong, M. Wu, J. H. Bae, H. I. Kwon, B. G. Park and J. H. Lee, *Sens. Actuators, B* 2018, **258**, 574-579.
3. L. L. Wang, L. P. Kang, H. Y. Wang, Z. P. Chen and X. J. Li, *Sens. Actuators, B* 2016, **229**, 513-519.
4. H.T. Hsueh, T. J. Hsueh, S. J. Chang, F. Y. Hung, T. Y. Tsai, W.Y. Weng, C. L. Hsu and B.T. Dai, *Sens. Actuators, B* 2011, **156**, 906-911.
5. X. Wang, J. H. Li, Y. L. Li, L. J. Liu and W. Guan, *Sens. Actuators, B* 2016, **237**, 894-898.
6. F. S. Tsai and S. J. Wang, *Sens. Actuators, B* 2014, **193**, 280-287.

7. A. S. Ismail, M. H. Mamat, N. D. Md. Sin, M. F. Malek, A. S. Zoolfakar, A. B. Suriani, A. Mohamed, M. K. Ahmad and M. Rusop, *Ceramics International* 2016, **42**, 9785-9795.
8. K. Narimani, F. D. Nayeri, M. Kolahdouz and P. Ebrahimi *Sens. Actuators, B* 2016, **224**, 338-343.
9. Q. Kuang, C. Lao, Z. L. Wang, Z. Xie and L. Zheng, *J. Am. Chem. Soc.* 2007, **129**, 6070-6071.
10. R. K. Jha and P. K. Guha, *IEEE Transactions on Nanotechnology* 2018, **17**, 582-589.
11. Q. Yuan, N. Li, W. Geng, Y. Chi, J. Tuc, X. Li and C. Shao, *Sens. Actuators, B* 2011, **160**, 334-340.
12. R. K. Jha and P. K. Guha, *Nanotechnology* 2016, **27**, 475503 1-11.
13. P. Pascariua, A. Airinei, N. Olaru, I. Petrila, V. Nicad, L. Sacarescu and F. Tudorache, *Sens. Actuators, B* 2016, **222**, 1024-1031.
14. S. Manjunatha, B. Chethan, Y. T. Ravikiran and T. Machappa, *AIP Conf. Proc.* 2018, **1953**, 030096-1-4.
15. S. Y. Park, J. E. Lee, Y. H. Kim, J. J. Kim, Y. S. Shim, S. Y. Kim, M. H. Lee and H. W. Jang, *Sens. Actuators, B* 2018, **258**, 775-782.
16. N. M. Kiasari, S. Soltanian, B. Gholamkhas and P. Servati, *Sens. Actuators, A* 2012, **182**, 101-105.
17. Z. Li, A. A. Haidry, B. Gao, T. Wang and Z. J. Yao, *Appl. Surf. Sci.* 2017, **412**, 638-647.
18. R. K. Jha, D. Burman, S. Santra and P. K. Guha, *IEEE Sens* 2017, **17**, 7340-7347.
19. Y. Zhang, W. Fu, H. Yang, Q. Qi, Y. Zeng, T. Zhang, R. Ge and G. Zou, *Appl. Surf. Sci.* 2008, **254**, 5545-5547.
20. R. J. Wu, Y. L. Sun, C. C. Lin, H. W. Chen and M. Chavali, *Sens. Actuators, B* 2006, **115**, 198-204.
21. K. P. Biju and M. K. Jain, *Meas. Sci. Technol.* 2007, **18**, 2991-2996.
22. X. Ning, Z. Wang and Z. Zhang, *Adv. Funct. Mater.* 2014, **24**, 5393-5401.
23. W. D. Lina, C. T. Liao, T. C. Chang, S. H. Chen and R. J. Wu, *Sens. Actuators, B* 2015, **209**, 555-561.
24. H. Li, B. Liu, D. Cai, Y. Wang, Y. Liu, L. Mei, L. Wang, D. Wang, Q. Lia and T. Wang, *J. Mater. Chem. A* 2014, **2**, 6854-6862.
25. S. Guo, A. Arab, S. Krylyuk and A. V. Davydov, Proceedings of the 17<sup>th</sup> IEEE International Conference on Nanotechnology, 2017 (doi:10.1109/NANO.2017.8117408).
26. S. L. Zhang, H. H. Choi, H. Y. Yue and W. C. Yang, *Curr. Appl. Phys.* 2014, **14**, 264-268.
27. A. S. Pawbake, R. G. Waykar, D. J. Late and S. R. Jadkar, *Appl. Mater. Interfaces* 2016, **8**, 3359-3365.
28. J. Feng, L. Peng, C. Wu, X. Sun, S. Hu, C. Lin, J. Dai, J. Yang and Y. Xie, *Adv. Mater.* 2012, **24**, 1969-1974.
29. A. S. Pawbake, S. R. Jadkar and D. J. Late, *Mater. Res. Express* 2016, **3**, 105038(1-8).
30. A. Sharma, Y. Kumar, K. Mazumder, A. K. Rana and P. M. Shirage, *New J. Chem.* 2018, **42**, 8445-8457.
31. Y. Kumar, A. Sharma and P. M. Shirage, *RSC Adv.* 2017, **7**, 55778-55785.
